# Supplementary material for: Mesoporous titanium dioxide coating on gold modified silica nanotubes: a tube-in-tube titanium nanostructure for visible-light photocatalysts
Source: Royal Society of Chemistry journal article supplement (doi:10.1039/c5ra11934k), 2015-01-01
Supplement: c5ra11934k1.pdf [file c5ra11934k1.pdf]

## Supporting information

### Mesoporous Titanium Dioxide Coating on Gold Modified Silica Nanotubes: A Tube-in-Tube Titanium Nanostructure for Visible-Light Photocatalyst

Xinzhe Li,<sup>a</sup> Yiyun Fang,<sup>a</sup> Yiping Hu,<sup>b</sup> Hongfei Huo,<sup>a</sup> Shiling Zhao,<sup>a</sup> Xuefeng Long,<sup>a</sup>

Jiantai Ma<sup>a\*</sup>, Rong Li<sup>a\*</sup>

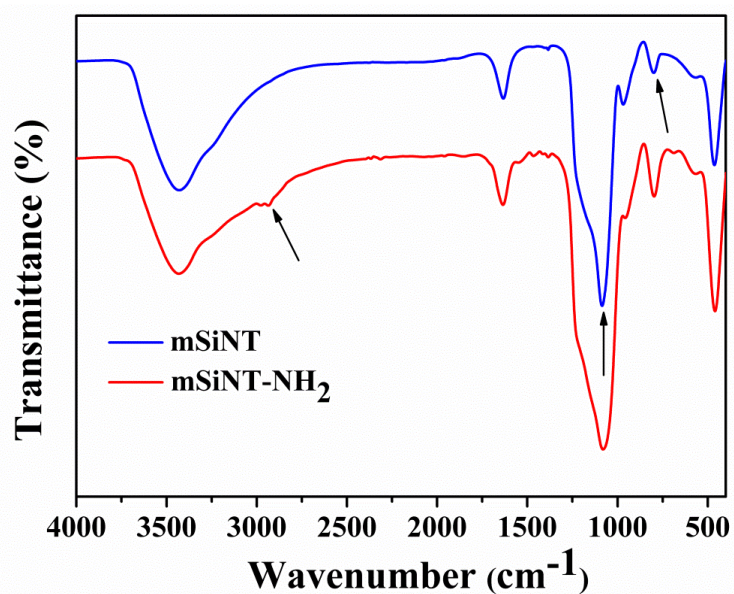

Fig. S1 FT-IR spectra of the mSiNTs before and after surface modification with 3-APTES, wherein, the absorption bands at 800 and 1081 cm<sup>-1</sup> were assigned to the  $\nu_s(\text{Si-O-Si})$  and  $\nu_{as}(\text{Si-O-Si})$  vibrations, respectively, and the new peaks at 2925 cm<sup>-1</sup> correspond to  $-\text{CH}_2-$  group of aminopropyl from 3-APTES molecules.

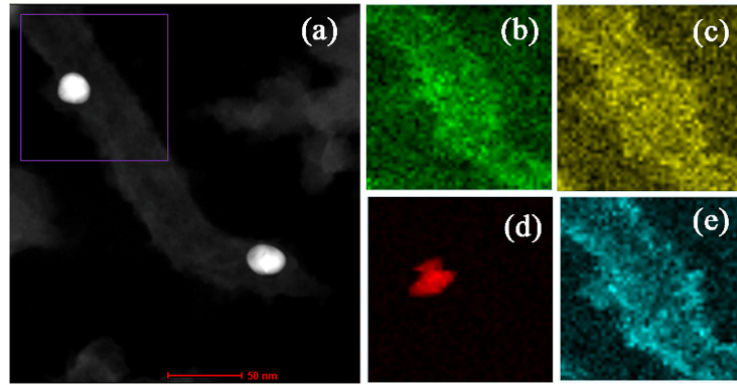

Fig. S2 (a) High angle annular dark field-scanning transmission electron microscopy (HAADF-STEM) image and mapping results of the elements (b) Si, (c) O, (d) Au, and (e) Ti for the boxed area of (a).

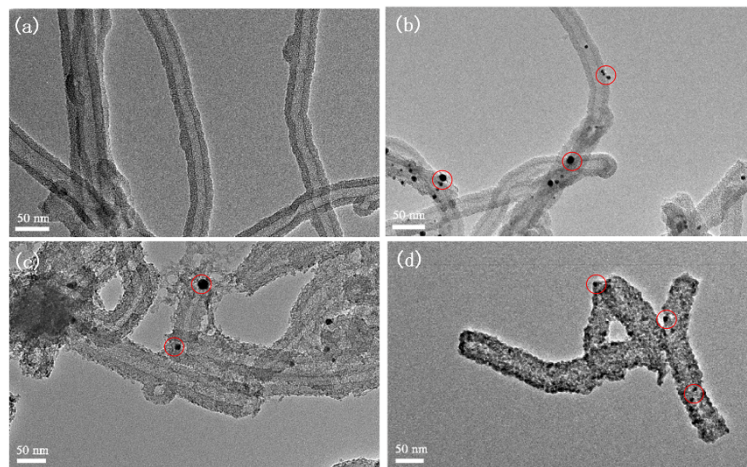

Fig. S3 TEM images of (a) mSiNTs, (b) mSiNTs-N/Au, (c) mSiNTs-N/Au@TiO<sub>2</sub>, (d) mSiNTs-N/Au@TiO<sub>2</sub>, to illustrate the distribution of Au NPs.

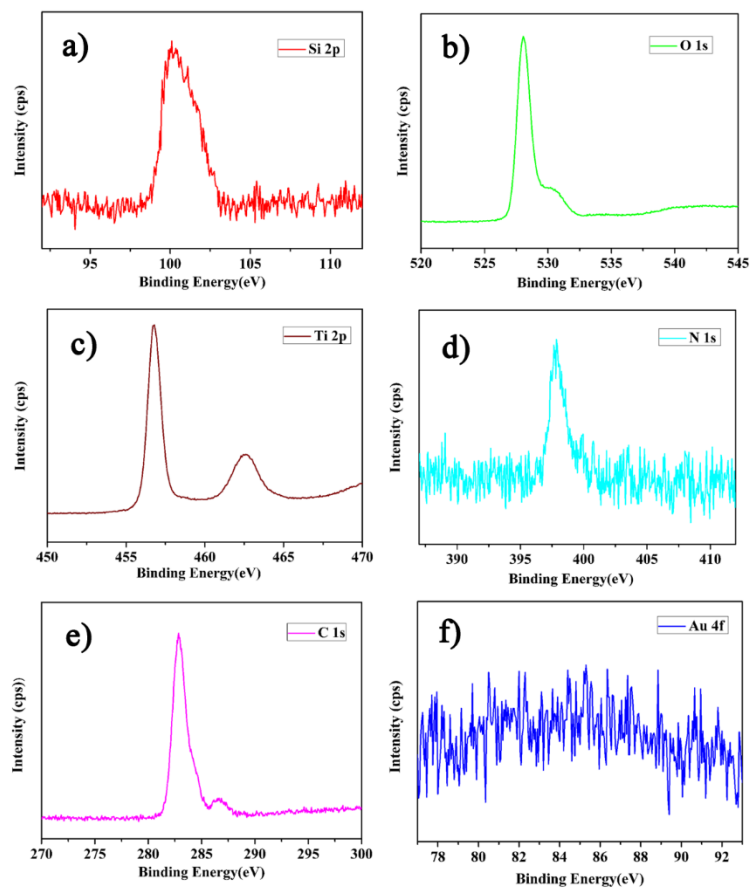

Fig. S4 XPS measurements for the as-obtained mSiNTs-N/Au@TiO<sub>2</sub> photocatalyst: a) Si 2p, b) O 1s, c) Ti 2p, d) N 1s, e) C 1s and f) Au 4f.

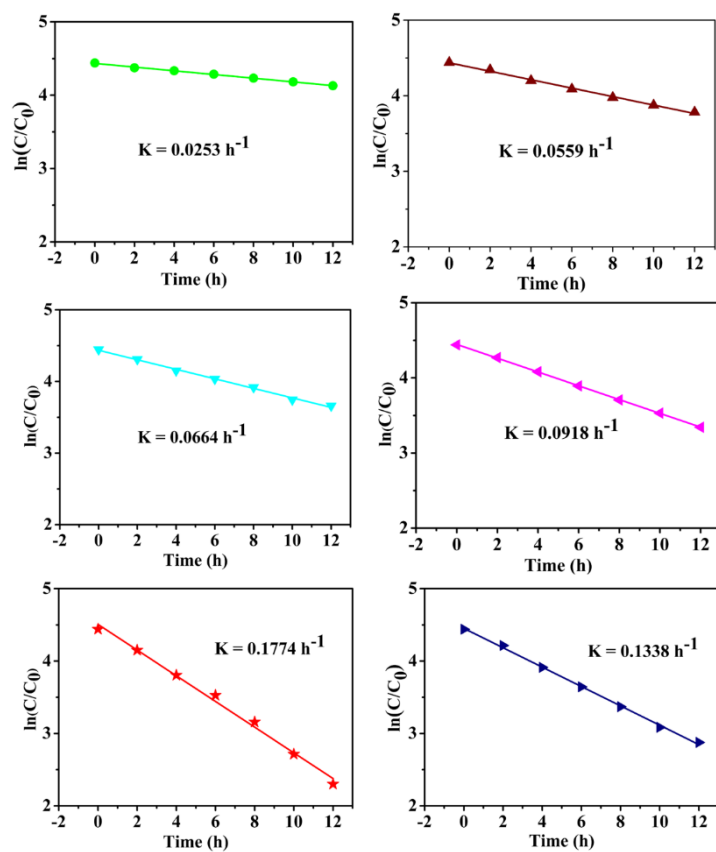

Fig. S5 Kinetic curve for the degrading RhB catalyzed by mSiNTs@TiO<sub>2</sub> (●), mSiNTs-N@TiO<sub>2</sub> (▲), mSiNTs-N/Au<sub>0.02%</sub>@TiO<sub>2</sub> (▼), mSiNTs-N/Au<sub>0.04%</sub>@TiO<sub>2</sub> (◆), mSiNTs-N/Au<sub>0.06%</sub>@TiO<sub>2</sub> (★), mSiNTs-N/Au<sub>0.08%</sub>@TiO<sub>2</sub> (◆).
